# Supplementary material for: Buruli ulcer disease prevalence in Benin, West Africa: associations with land use/cover and the identification of disease clusters
Source: Springer Nature journal article supplement (doi:10.1186/1476-072x-7-25), 2008-01-01
Supplement: Additional file 1 [file 1476-072x-7-25-s1.doc]

**AICc weights and strength of evidence for negative binomial regression candidate models.** Response variable is the number of Buruli ulcer cases in villages in Benin, West Africa (*n* = 327 villages). All models contained as a covariate, where = is the total population for village *i* in district *j*, as an offset term and a random effect for the district where each village was located (see equation 1). The null model is a model that includes only an intercept and the offset term. Models are sorted descending based on AICc weights. ag = agricultural land use, elevation = mean village elevation. All land use/cover types are proportions within a 20 km buffer of each village. See Table 1 for summary of covariates.

| Model | AICc | AICc weight | Strength of evidence |
| --- | --- | --- | --- |
| urban+forest+elevation+standard deviation of the wetness index | 1114.6 | 1.00 | 1.00 |
| urban+elevation+standard deviation of the wetness index | 1116.2 | 2.3 | 2.28 |
| urban+elevation | 1117.4 | 5.4 | 5.42 |
| urban+forest+elevation | 1118.3 | 6.5 | 6.50 |
| urban+ag+elevation | 1120.0 | 15.3 | 15.32 |
| urban+forest+elevation+wetland | 1120.3 | 17.7 | 17.71 |
| urban+forest+elevation+wetland+distance to river | 1121.2 | 28.1 | 28.06 |
| elevation | 1124.4 | 137.7 | 1.38E+02 |
| urban+forest+ standard deviation of the wetness index | 1126.5 | 400.3 | 4.00E+02 |
| urban+ standard deviation of the wetness index | 1129.4 | 1.7E+03 | 1.71E+03 |
| urban | 1131.4 | 4.6E+03 | 4.56E+03 |
| urban+ag | 1131.5 | 4.7E+03 | 4.68E+03 |
| distance to river+wetness index | 1139.0 | 2.0E+05 | 2.03E+05 |
| forest | 1139.1 | 2.1E+05 | 2.10E+05 |
| ag | 1140.6 | 4.5E+05 | 4.48E+05 |
| distance to river | 1141.4 | 6.8E+05 | 6.75E+05 |
| standard deviation of the wetness index | 1141.7 | 7.9E+05 | 7.93E+05 |
| wetland | 1141.8 | 8.3E+05 | 8.34E+05 |
| wetness index | 1141.9 | 8.9E+05 | 8.88E+05 |
| random intercept | 1145.4 | 5.1E+06 | 5.10E+06 |
